# Supplementary material for: Pt catalyzed formation of a Ni@Pt/reduced graphene oxide nanocomposite: preparation and electrochemical sensing application for glucose detection
Source: Royal Society of Chemistry journal article supplement (doi:10.1039/c8ay01275j), 2018-01-01
Supplement: c8ay01275j1.pdf [file c8ay01275j1.pdf]

# **Pt catalyzed formation of Ni@Pt/reduced graphene oxide nanocomposite: preparation and electrochemical sensing application for glucose detection**

Lian Ma<sup>a</sup>, Xiaoyan Wang<sup>a</sup>, Qiaran Zhang<sup>a</sup>, Xinli Tong<sup>a</sup>, Yue Zhang<sup>a\*</sup> and Zhuang Li<sup>b</sup>

*Tianjin Key Laboratory of Organic Solar Cells and Photochemical Conversion,  
School of Chemistry & Chemical Engineering, Tianjin University of Technology,  
Tianjin 300384, PR China*

---

\* Corresponding author. E-mail address: yuezhang@tjut.edu.cn



## Supporting Information

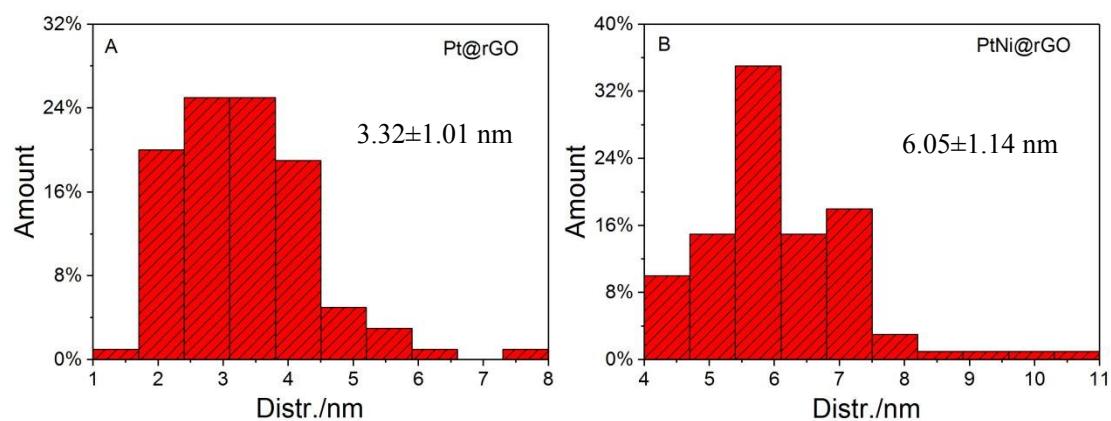

**Fig. S1.** The diameter analysis of Pt@rGO (A) and PtNi@rGO (B).

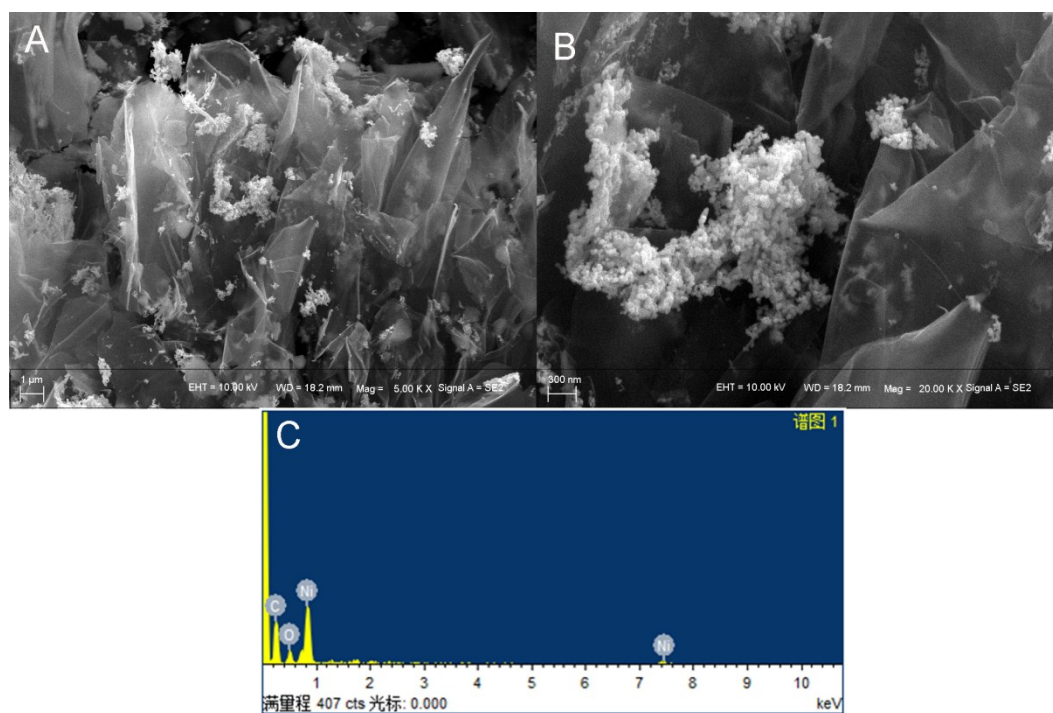

**Fig. S2** SEM images (A, B) and EDS analysis (C) of Ni/rGO without Pt-catalyzed reduction.



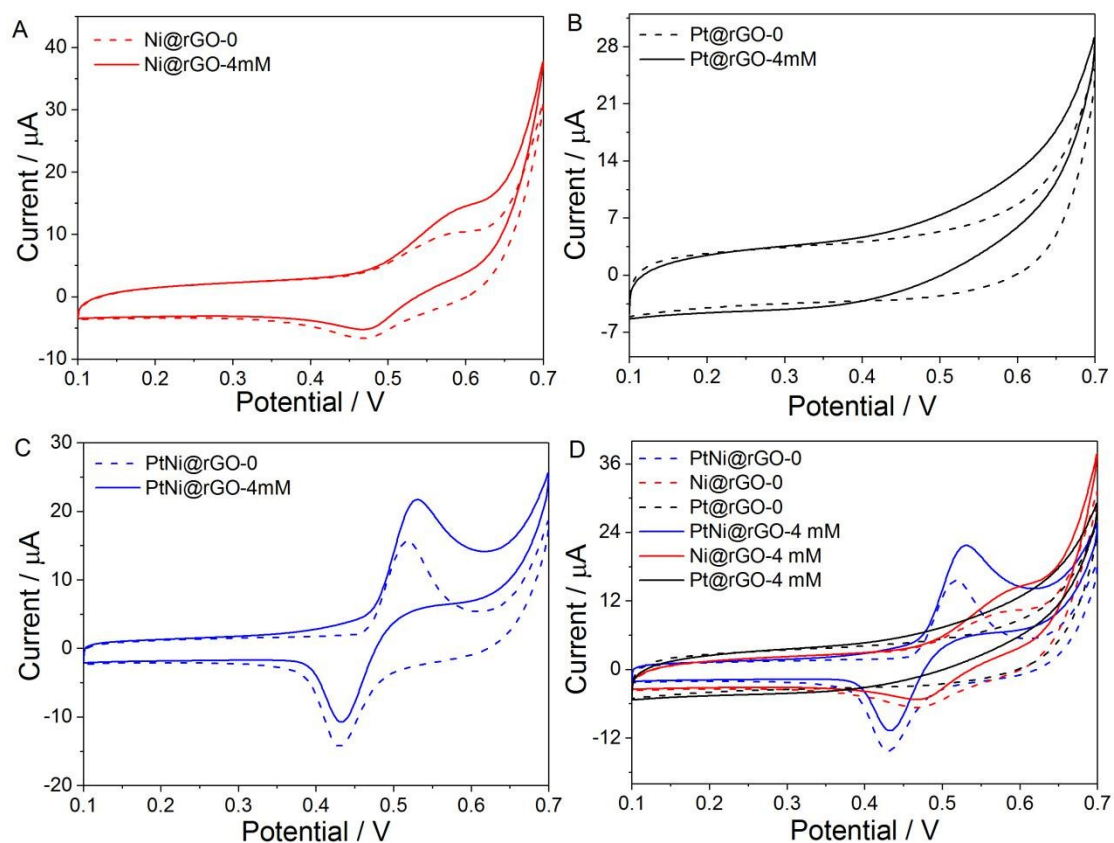

**Fig. S3** Comparison of three electrodes in absence (dash line) and presence (solid line) of 4.0 mM glucose in 0.1 M NaOH by CV. Scan rate: 50 mV s<sup>-1</sup>.

**Table S1** Determination of glucose in human serum by our developed glucose sensor.

| Sample | Determined by a<br>blood glucose meter<br>(mM) | Determined by our sensor<br>(mM) | RSD (%) |
|--------|------------------------------------------------|----------------------------------|---------|
| 1      | 4.23                                           | 4.16                             | 28.14   |
| 2      | 8.23                                           | 8.40                             | 23.90   |
